# Supplementary material for: Life-Course Persistent Antisocial Behavior and Accelerated Biological Aging in a Longitudinal Birth Cohort
Source: Preprints.org preprint supplement (doi:10.20944/preprints202210.0018.v1), 2022-10-04

**Attrition analysis**

We conducted an attrition analysis using childhood SES, childhood IQ and childhood self-control to determine whether participants in the Phase 45 data collection were representative of the original cohort.

No significant differences were found between the full cohort, those deceased, those alive or those seen at Phase 45 on childhood SES.


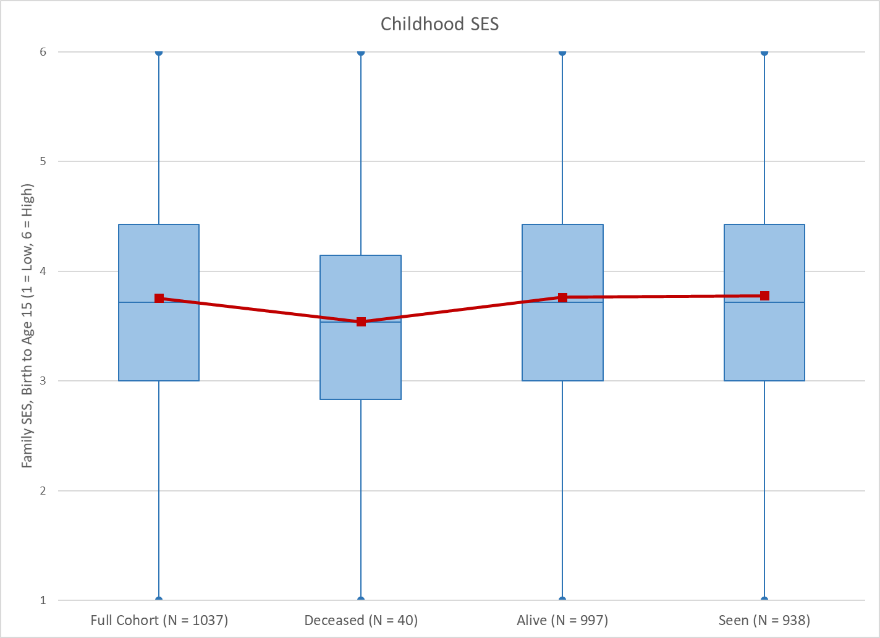


No significant differences in childhood IQ were found between the full cohort, those still alive or those seen at Phase 45. Those who were deceased by the Phase 45 data collection had significantly lower childhood IQ’s than those who were still alive (t = 2.09, p = 0.04).


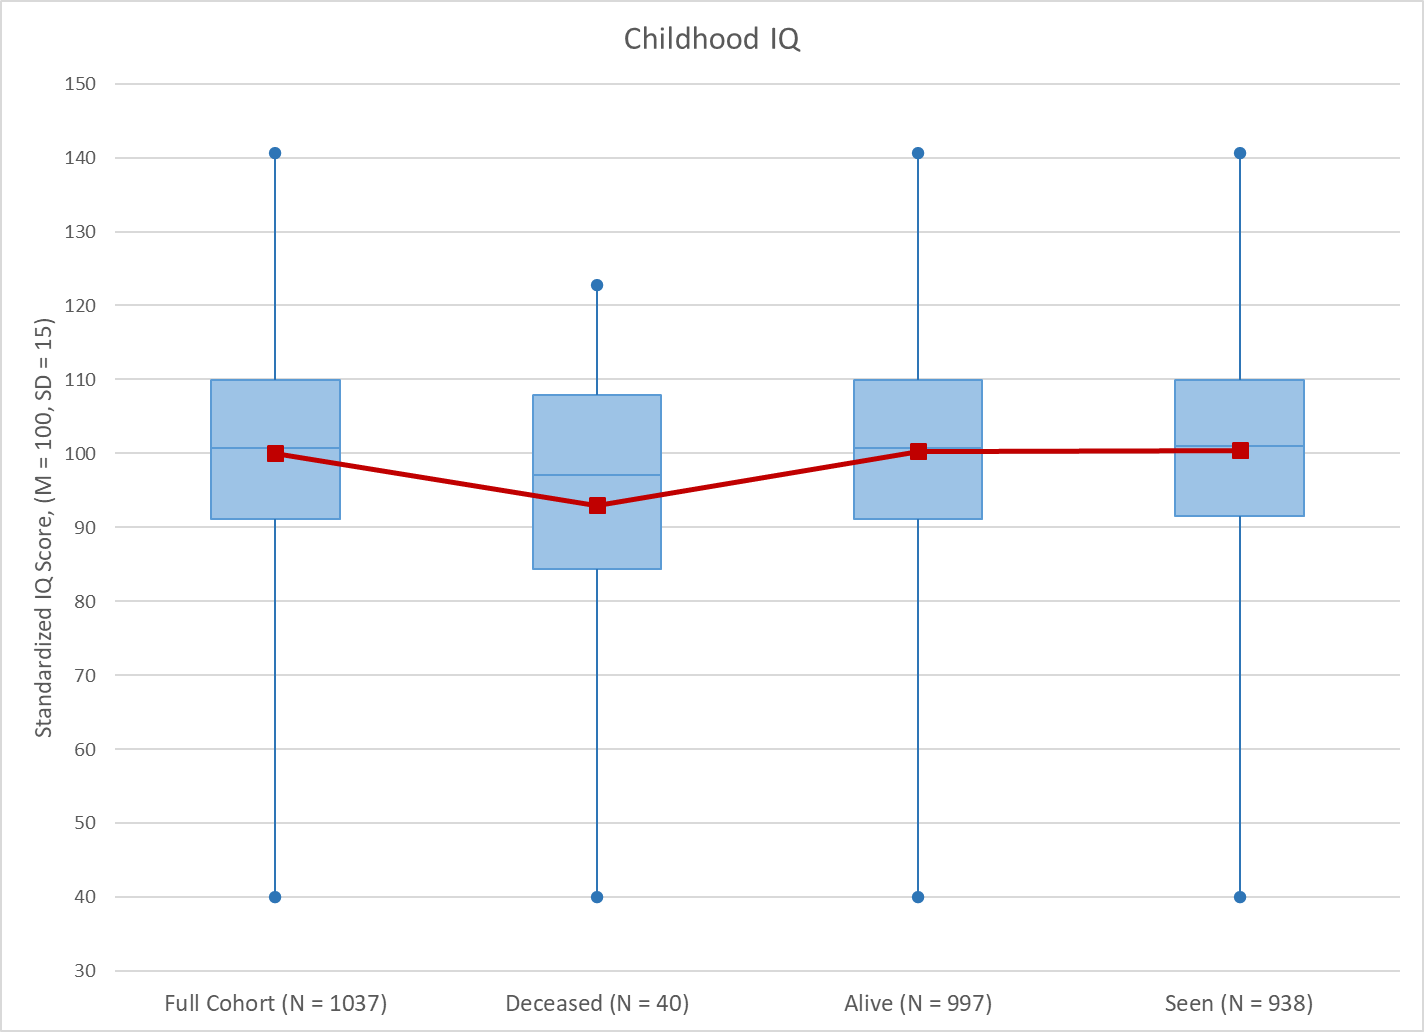


No significant differences were found between the full cohort, those deceased, those alive or those seen at Phase 45 on Childhood Low Self-Control.


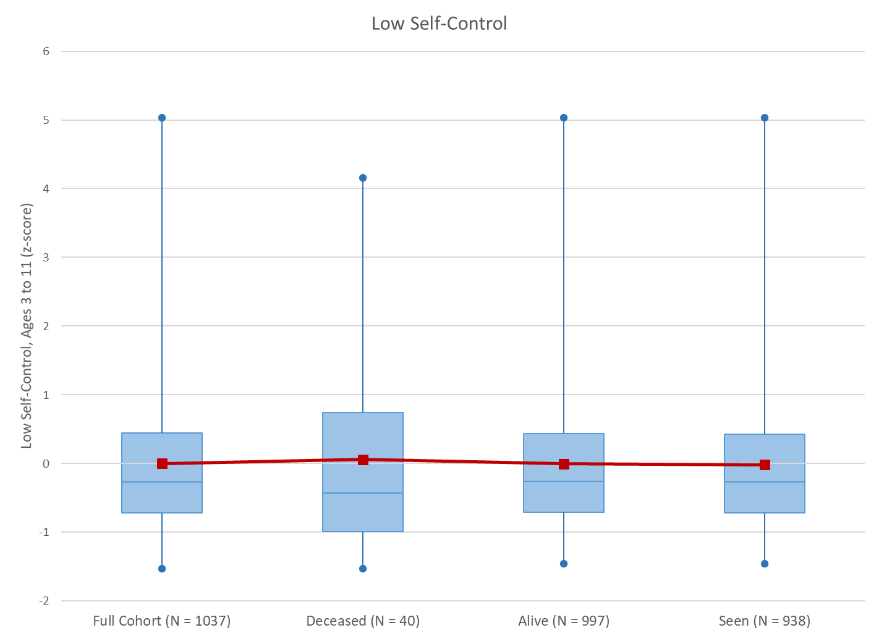

Supplement: Supplementary file 1 [file supplementary]
